## RESEARCH ARTICLE

# Human procurement of meat from lion (*Panthera leo*) kills: Costs of disturbance and implications for carnivore conservation

Paula A. White<sup>1\*</sup>, Laura D. Bertola<sup>2,3</sup>, Kennedy Kariuki<sup>4</sup>, Hans H. de Iongh<sup>3,4</sup>

**1** Center for Tropical Research, Institute of the Environment and Sustainability, University of California Los Angeles, Los Angeles, California, United States of America, **2** Department of Biology, University of Copenhagen, Copenhagen, Denmark, **3** Leo Foundation, Wageningen, The Netherlands, **4** Institute of Environmental Sciences, Leiden University, RA Leiden, The Netherlands

\* [paw@carnivoreconservation.com](mailto:paw@carnivoreconservation.com)

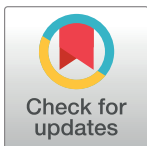

## Abstract

In Africa, humans and large carnivores compete over access to resources, including prey. Disturbance by humans to kills made by carnivores, often for purposes of obtaining all or portions of the carcass, constitutes a form of human-wildlife conflict. However the occurrence of this practice, known as human kleptoparasitism, and its impact on carnivores has received little scientific attention. We obtained expert opinions from African lion researchers and stakeholders via a standardized questionnaire to characterize the geographic extent and frequency of human kleptoparasitism as it occurs in modern times. Our survey found modern human kleptoparasitism on kills made by lions, and possibly other large carnivores in Africa, to be geographically more widespread than previously reported. Meat lost to humans requires carnivores to hunt and kill additional prey thereby causing stress, increasing their energetic costs and risks of natural injury, and exposing them to risk of direct injury or death from human usurpers. Because of their conspicuous behaviors and tendency towards killing large-bodied prey, lions are particularly susceptible to humans detecting their kills. While human kleptoparasitism was geographically widespread, socio-economic factors influenced the frequency of occurrence. Prey type (wild game or domestic livestock) influenced human attitudes towards meat theft; ownership allows for legal recovery of livestock carcasses, while possessing wild game meat is mostly illegal and may incur penalties. Meat theft was associated with other illegal activities (i.e., illegal mining) and most prevalent among people of low income, including underpaid game scouts. Despite quantifiable costs to carnivores of human disturbance to their kills, the majority of experts surveyed reported a lack of knowledge on this practice. We propose that human disturbance at kills, especially loss of prey through human kleptoparasitism, constitutes an important anthropogenic threat that may seriously impact energy budgets of individual lions and other scavengers when meat and carcasses are removed from the ecosystem, and that the costs incurred by carnivores warrants further investigation.

## OPEN ACCESS

**Citation:** White PA, Bertola LD, Kariuki K, de Iongh HH (2024) Human procurement of meat from lion (*Panthera leo*) kills: Costs of disturbance and implications for carnivore conservation. PLoS ONE 19(8): e0308068. <https://doi.org/10.1371/journal.pone.0308068>

**Editor:** Bogdan Cristescu, Cheetah Conservation Fund, Namibia University of Science and Technology, NAMIBIA

**Received:** March 11, 2024

**Accepted:** July 16, 2024

**Published:** August 14, 2024

**Copyright:** © 2024 White et al. This is an open access article distributed under the terms of the [Creative Commons Attribution License](https://creativecommons.org/licenses/by/4.0/), which permits unrestricted use, distribution, and reproduction in any medium, provided the original author and source are credited.

**Data Availability Statement:** All relevant data are within the manuscript and its [Supporting Information](#) files.

**Funding:** The author(s) received no specific funding for this work.

**Competing interests:** The authors have declared that no competing interests exist.

## Introduction

Carnivores incur energetic costs and risk injury when hunting and killing their prey [1]. Each stage of a hunt e.g., locating, stalking or chasing, and killing prey requires considerable energy expenditure [2–8]. Prey pursuit and capture entails physical risks to predators [9], including the possibility of being injured [10] or killed [11, 12]. Following a successful hunt, a carnivore may face the added cost and risk of defending its prey from being stolen (kleptoparasitized [13]) by conspecifics, other carnivore species [14–18], or by humans [19, 20]. While considerable attention has been paid to humans deliberately killing carnivores (e.g., trophy hunting [21–23], and lethal removal as a form of management [24]), non-lethal impacts have received far less consideration [25–28].

Human activities such as ecotourism viewing can disturb and stress carnivores [25, 29, 30], including while the animals are hunting [31–32]. Humans also target carnivore kills to obtain meat for personal consumption and to sell or trade [19, 20, 33–36].

Although early hominids are believed to have, at times, hunted game [37], the practice of early hominids obtaining meat from carnivore kills, referred to as human kleptoparasitism, has been well-documented [38–41]. Human kleptoparasitism is known to still occur in modern times (i.e., during the past 60 years) [19, 20, 33, 34, 36]. In their examination of data from human-carnivore conflicts in Uganda between the years 1923–1994, including human kleptoparasitism, Treves and Naughton-Treves (1999) highlighted the interlinked evolutionary histories of humans and early hominids that shared their habitats with large carnivores. However, to date, the geographic scale, frequency, and the potential impact on carnivores of the modern practice of human kleptoparasitism have not been adequately investigated [20]. A paucity of reports 35 years ago led Sunquist and Sunquist (1989) to conclude that while human kleptoparasitism appeared to pose no significant threat to individual carnivores in the short-term, repeated losses could negatively impact carnivore populations in the long-term. Lacking an in-depth exploration of the modern practice, it is likely that both the costs to individual carnivores, and the population-wide effects, have been underestimated.

Humans are now considered a “super-predator” [42], and human disturbance in the proximity of kills has been shown to induce fear in large carnivores [43–45], likely resulting in stress, reducing the overall time spent at the carcass [44], and reducing the total amount of meat consumed [36, 46, 47]. Even a perceived risk of encountering humans may cause carnivores to alter their behaviors and movements [27, 44, 45, 48], including abandoning their kills [49], or shifting to increased nocturnality [50].

Loss of kills to humans increases the frequency at which a carnivore must hunt [36, 43, 47], thereby increasing the costs and risks for an animal to obtain the equivalent amount of energy i.e., meat [44]. For carnivores that return to their kill following human disturbance, loss of a partial or complete carcass decreases or eliminates the amount of meat remaining for subsequent feeding bouts [33], reducing the energy gained per kill [44]. Removal of carrion also reduces or eliminates food resources for scavengers [36] potentially disrupting scavenger communities and associated ecosystem services e.g., nutrient cycling [51–54].

Humans that actively chase carnivores from their kills to obtain meat (confrontational scavenging) may injure carnivores, or may themselves be injured or killed in the process [19, 55]. Carnivores that injure humans in defense of their kills may subsequently be destroyed as problem animals [19, 55]. Additionally, once kills have been located, humans may poison carcasses [56–58] to kill carnivores and scavengers under the auspices of animal control, in retaliation for livestock depredation [59, 60], or to obtain body parts for illegal trade [61, 62].

Despite this broad range of known impacts, our understanding of the extent and frequency of modern human kleptoparasitism is lacking. The few previous reports available have focused

primarily on anecdotal or regional accounts [19, 20, 33, 34]. However, other factors e.g., geographic location of the kill within or outside of protected area boundaries, legal ramifications of possessing game meat, and cultural or religious taboos, may influence the occurrence of human kleptoparasitism.

Given that the majority of modern threats to large carnivores are anthropogenic [63–65], and that anthropogenic threats are likely to be cumulative, further investigation into the potential impacts of modern human kleptoparasitism on carnivores is warranted.

To address this data gap, we conducted a questionnaire survey among lion experts and stakeholders with knowledge of the African lion, *Panthera leo*, in the current African range states to elucidate the geographic extent, frequency, and socio-economic drivers of modern human kleptoparasitism. Due to their conspicuous social behaviors and reliance on large-bodied prey [66], lions may be particularly vulnerable to being detected on their kills [67]. While our survey focused on the kills made by lions, respondents were asked about the occurrence of human kleptoparasitism on other large carnivores in their areas i.e., leopard, *Panthera pardus*, spotted hyena, *Crocuta crocuta*, wild dog, *Lycaon pictus*, cheetah, *Acinonyx jubatus*.

This study represents the first effort to systematically characterize and assess modern human kleptoparasitism across the range of the African lion, and to illustrate the suite of potential costs faced by carnivores exposed to this practice.

## Methods

We developed a questionnaire survey with a goal of quantifying the geographic extent, rate of occurrence, trends, and other associated factors e.g., legality, cultural or religious taboos, of humans taking meat from the kills of large carnivores in sub-Saharan Africa. To prospectively recruit participants, we distributed a pre-structured questionnaire (S1 Appendix) among lion experts in the African Lion Working Group (ALWG), a working group of approximately 90 members under auspices of the IUCN Cat Specialist Group. The ALWG represents active lion researchers, and other stakeholders, whose work may not involve field studies. Thus, we did not anticipate receiving responses from every ALWG member. Additionally, we circulated the survey among approximately 35 other stakeholders with knowledge of wild carnivores (with a focus on *P. leo*) i.e., conservation organizations, lodge owners, and professional hunters in lion range states. The goal was to query lion experts' and stakeholders' existing knowledge i.e., direct observations, received reports, and opinions of the practice within their geographic area (s). Although some survey recipients did not conduct scientific studies per se, the geographic area described in a respondents' survey is hereafter referred to as their study area.

On 31 May 2020, we circulated the questionnaire in the text of an e-mail and as an attached document with a request for respondents to reply through whatever means was most convenient. We sent a follow-up reminder on 15 June 2020, and set a cut-off date of 2 July 2020 to receive responses. If respondents had knowledge about more than one study area, we requested that they complete one questionnaire for each study area. In addition to completed questionnaires, some respondents also provided comments via e-mail; others provided only e-mail comments but did not complete the questionnaire. Some respondents who completed the survey did not answer every question, thus reported sample sizes vary. Additionally, some research teams designated one person to reply on behalf of the team with information from their study area; such replies were tallied as one respondent. All answers, whether obtained from questionnaires or in e-mail format, were incorporated into the results to the extent possible. Apart from maintaining the geographic context (country) of the data received, responses were combined and the specific locations of the study areas, as well as the identities of the responding individuals, were kept confidential.

The pre-structured survey form contained twelve questions focused on whether kleptoparasitism by humans had been observed or reported to occur in the respondent's study area, how information was obtained, and details of the practice e.g., how often and by whom (S1 Appendix). Further, we examined whether the kleptoparasitism events involved wild prey or livestock, and how prey type influenced human attitudes and responses. Respondents were asked how long they had worked in the study area (tenure), and, whether in their expert opinion, kleptoparasitism represented a potential threat to lions in their study area (Question #8) or across the species' range (Question #9). For respondents who completed surveys for more than one study area, we counted their answer to Question #9 only once regardless of how many surveys they completed. All other answers were tallied as representing individual responses. Because the answer options to the frequency of occurrence were presented as a range of values e.g., 1–5, 6–10, etc., (S1 Appendix), we used the average value within each option when considering frequency of occurrence on respondents' tenure. For example, for option a) 1–5 times/year, we used a value of 2.5 times/year when examining frequency of occurrence on tenure.

We performed descriptive statistics on the different responses to each question, and performed a Welch two-sided t-test to examine whether knowledge of the presence of human kleptoparasitism in a study area was influenced by the respondents' tenure in that area. We also performed chi-square tests of independence to examine whether a respondent's knowledge of kleptoparasitism in their study area influenced their opinion regarding whether or not kleptoparasitism represented a potential conservation threat to lions across the species' range. We considered a result statistically significant at  $p < 0.05$ .

### Ethics statement

We followed the checklist of the Science Faculty of Leiden University and concluded that application with the Ethics Committee did not apply for our survey. All respondents completed the survey voluntarily and provided written informed consent via survey(s) or e-mail for the data to be used for this purpose. All responses were treated as confidential. The completed PLOS ONE Human Subjects Research Checklist was included as part of this submission.

### Inclusivity in global research

Additional information regarding the ethical, cultural, and scientific considerations specific to inclusivity in global research is included in the Supporting Information (S1 Checklist).

### Results

We received 56 completed questionnaires from 33 individual respondents (14 respondents completed questionnaires for more than one study area). An additional 5 respondents provided e-mailed comments but did not complete a survey. The 38 total respondents were comprised of 31 ALWG members and 7 stakeholders (response rate 34% and 20%, respectively). Thus, our results represent experts' knowledge of extant lion populations from 56 studies located in 15 of 22 African lion range states (Fig 1). The 15 surveyed range states include all resident lion populations in West Africa and nearly all East and Southern African range states that, combined, account for > 95% of Africa's lions [68] (S1 Table). The occurrence of human kleptoparasitism on the kills of wild carnivores was reported in 37 of the 56 questionnaires (66%) received, confirming modern occurrence of the practice in 12 of the 15 range states surveyed (Fig 1; S1 Table).

The number of years (tenure) spent by individual respondents in their respective study areas ranged from 1 to 30 years ( $X = 11.9$  years). There was no significant difference in tenure

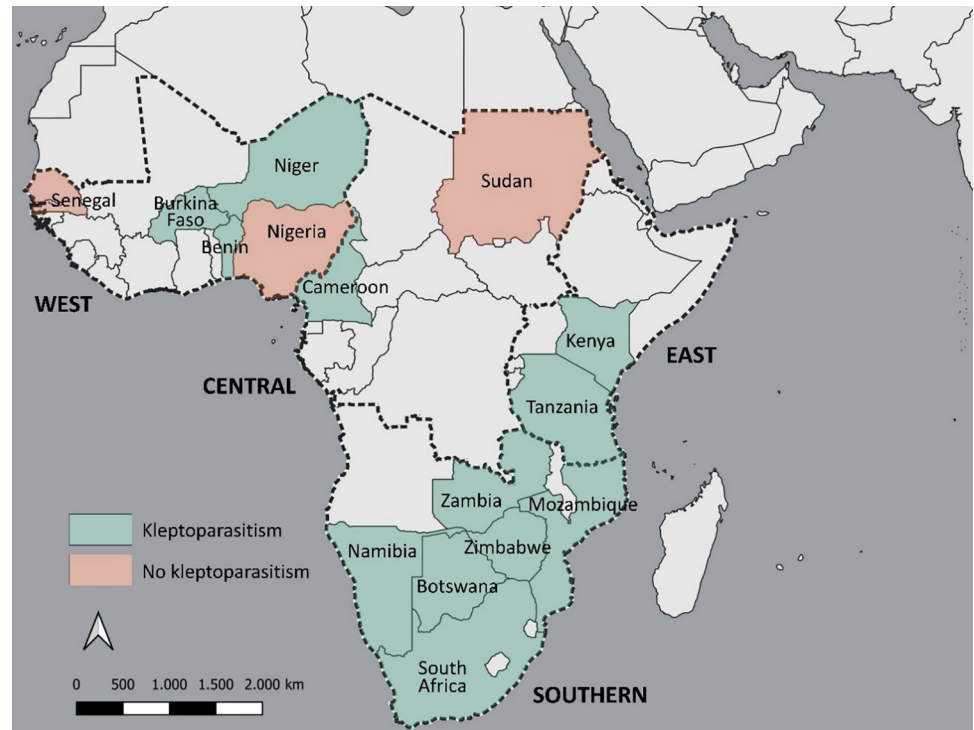

**Fig 1. Map of the African lion range states surveyed for modern human kleptoparasitism.** Highlighting indicates countries in which occurrence (green) or no occurrence (brown) was reported. The geographic regions of West, Central, East, and Southern Africa are demarked by dotted black lines. Figure generated with QGIS software by author Laura Bertola using layers (e.g., country borders) which are copyright-free to re-purpose for non-commercial use.

<https://doi.org/10.1371/journal.pone.0308068.g001>

between respondents who reported occurrence of kleptoparasitism in their area ( $X = 10.8$  years) and those who reported no occurrence ( $X = 11.6$  years, Welch two-sample t-test ( $26.9 = 0.3, p = .76$ )). There was no significant association between a respondent having reported human kleptoparasitism within a study area and whether, in their expert opinion, this practice represented a threat to lions across the species’ range (Pearson’s chi-square test  $\chi^2 (1, N = 46) = 0.004, p = .94$ ).

A respondent’s knowledge of whether kleptoparasitism occurred in their study area was most often gained through reliable reports (40%) and direct observation (35%), followed by local gossip (25%) (Table 1). A reliable report was subjectively defined as a field assistant, wild-life officer, professional hunter, or conservation organization who themselves had directly observed the practice and subsequently relayed that information to the survey respondent.

Respondents indicated that in half (50%) of all reported occurrences, humans actively chased lions from kills; 36% of the time humans scavenged meat from kills when lions were

**Table 1. Respondents’ source for knowledge on the occurrence of kleptoparasitism, strategy for obtaining meat from kills, who procured meat, and nature of activity.**

| Survey Question                            |                                        |                               |                                   |
|--------------------------------------------|----------------------------------------|-------------------------------|-----------------------------------|
| (number of responses/total sample size; %) |                                        |                               |                                   |
| Source of knowledge of kleptoparasitism    | Strategy for obtaining meat from kills | Who procured meat             | Nature of activity                |
| Reliable reports (22/55; 0.40)             | Actively chase (26/52; 0.50)           | Local residents (33/56; 0.59) | Opportunistic (35/40; 0.88)       |
| Direct observation (19/55; 0.35)           | Scavenge (19/52; 0.36)                 | Game scouts (16/56; 0.29)     | Deliberate targeting (4/40; 0.10) |
| Local gossip (14/55; 0.25)                 | Other e.g., playbacks (7/52; 0.13)     | Non-residents (7/56; 0.12)    | Unknown (1/40; 0.3)               |

<https://doi.org/10.1371/journal.pone.0308068.t001>

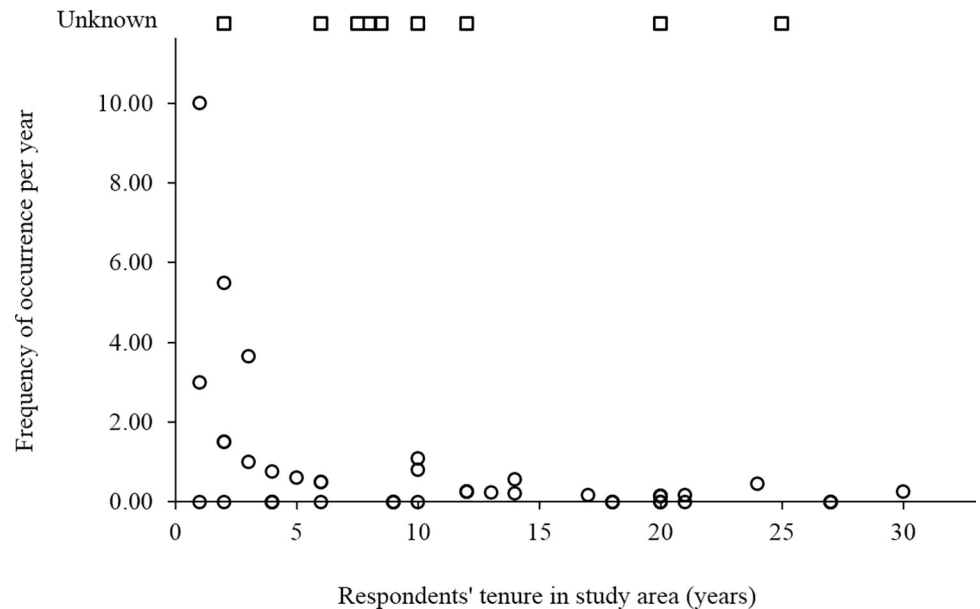

**Fig 2. Frequency of occurrence of kleptoparasitism in relation to respondents' tenure.** Square points show the tenure of nine respondents who reported kleptoparasitism occurring in their study area at unknown frequency.

<https://doi.org/10.1371/journal.pone.0308068.g002>

not present. An additional 13% of cases involved other strategies of humans obtaining meat, including responding to playbacks broadcast by researchers to attract carnivores (Table 1). In the latter case, because the playback imitated the sounds of a dying prey animal, it could be assumed that the intention of the approaching humans was to obtain meat by actively chasing the lions off of a fresh kill. However, because this was an assumption, these cases were grouped under “Other”.

Meat procurement was reported to be undertaken mostly by local residents (59%), or game scouts (29%). Game scouts are here defined as employees working for a wildlife authority or private organization who are trained to combat wildlife crimes and whose duties include apprehending poachers, confiscating wire snares and firearms, etc. A smaller percentage (12%) of cases involved non-residents (people who did not reside full-time in the community) i.e., transient or nomadic people, refugees, or seasonal workers (Table 1). The activity was reported as being largely opportunistic (88%), although a few respondents (10%) reported that the act involved deliberate targeting and following lions that were engaged in hunting (Table 1).

Of those respondents reporting kleptoparasitism, most (53%) had encountered human kleptoparasitism in their study area 1–5 times; others reported 5–10 occurrences (8%), or more than 10+ occurrences (14%). An additional 25% of respondents were aware of kleptoparasitism occurring in their study area, but did not know how often it occurred. Because length of tenure varied by individual respondent, we calculated frequency of occurrence per year of respondents' tenure so that rates were comparable across study areas and time periods (Fig 2).

Most respondents (49%) did not know whether the activity was increasing, stable, or decreasing; 30% reported steady occurrence of the practice, with smaller numbers reporting a decrease (14%) or increase (8%) during their tenure (Table 2).

Most (62%) respondents perceived human kleptoparasitism as representing no serious threat i.e., having no negative impact to lions within their study area. However, 16% of respondents perceived human kleptoparasitism as a possible threat with a potential to negatively



**Table 2. Trend of occurrence, level of perceived threat within a study area and across the species' range, cultural/religious significance, and prey type involved with human kleptoparasitism on lion kills.**

| <i>Survey Question</i>                            |                                                        |                                                                    |                            |                                                  |
|---------------------------------------------------|--------------------------------------------------------|--------------------------------------------------------------------|----------------------------|--------------------------------------------------|
| <i>(number of responses/total sample size; %)</i> |                                                        |                                                                    |                            |                                                  |
| <b>Trend of occurrence</b>                        | <b>Level of perceived threat (within study area)</b>   | <b>Cultural/Religious significance</b>                             | <b>Prey type</b>           | <b>Perceived as threat across species' range</b> |
| <i>Unknown (18/37; 0.49)</i>                      | No serious threat (23/37; 0.62)                        | Neutral (15/37; 0.41)                                              | Wild game<br>(20/37; 0.54) | No<br>(23/32; 0.72)                              |
| Steady occurrence (11/37; 0.30)                   | <i>Insufficient knowledge (8/37; 0.22)</i>             | Acceptable (13/37; 0.35)                                           | Livestock<br>(17/37; 0.46) | Yes<br>(9/32; 0.28)                              |
| Decreasing occurrence (5/37; 0.14)                | Possible threat/Potential negative impact (6/37; 0.16) | <i>Insufficient knowledge (7/37; 0.19)</i>                         |                            |                                                  |
| Increasing occurrence (3/37; 0.08)                |                                                        | Religious taboo (1/37; 0.03);<br>Occurs despite taboo (1/37; 0.03) |                            |                                                  |

Results shown in italics indicate proportion of respondents stating insufficient knowledge on the topic.

<https://doi.org/10.1371/journal.pone.0308068.t002>

impact lions within their study area (Table 2); 22% reported insufficient knowledge on the topic.

From a cultural standpoint, the majority reported the practice of obtaining meat from carnivore kills as being neutral (41%), or socially acceptable (35%). Two respondents reported that kleptoparasitism went against local religious beliefs, although one indicated that the practice occurred despite the taboo. The remaining respondents (19%) reported insufficient knowledge on the topic (Table 2).

Results showed that human kleptoparasitism was geographically widespread (Table 3). Prey type (wild game vs domestic livestock) was an important component in the likelihood of humans taking kills. Of the 37 respondents, slightly more than half (54%) reported carnivores losing wild game to humans, while the remaining 46% reported that humans only took the meat if carnivores had killed livestock.

Because livestock (numbers, species) and culture/religious practices vary regionally, we also considered trend, perceived threat within a study area, and prey type by consolidating responses into one of three regions: West and Central Africa (regions combined due to small sample sizes), East Africa, and Southern Africa. In West and Central Africa, livestock was the

**Table 3. Trend, perceived threat of kleptoparasitism within study areas, and prey type by region in surveyed range states where human kleptoparasitism was reported.**

| <i>Region</i>                    | <i>Survey Question</i>                           |                                                                 |                                             |
|----------------------------------|--------------------------------------------------|-----------------------------------------------------------------|---------------------------------------------|
|                                  | <b>Trend</b><br>Increase/Stable/Decrease/Unk (n) | <b>Perceived threat in study area</b> Possible/Unlikely/Unk (n) | <b>Prey type</b><br>Wild game/Livestock (n) |
| <b>West &amp; Central Africa</b> | 0 / 0.17 / 0 / 0.83 (6)                          | 0.17 / 0.67 / 0.17 (6)                                          | 0.83 / 0.17 (6)                             |
| <b>East Africa</b>               | 0.07 / 0.33 / 0.07 / 0.47 (15)                   | 0.07 / 0.60 / 0.33 (15)                                         | 0.43 / 0.57 (14)                            |
| <b>Southern Africa</b>           | 0.12 / 0.25 / 0.19 / 0.44 (16)                   | 0.25 / 0.62 / 0.12 (16)                                         | 0.53 / 0.47 (17)                            |

Results shown in italics indicate proportion of respondents stating insufficient knowledge on the topic.

<https://doi.org/10.1371/journal.pone.0308068.t003>

predominant prey type involved in human kleptoparasitism, whereas in both East and Southern Africa, humans took wild game and livestock prey in close to equal measures (Table 3).

In all regions, a high percentage of respondents reported insufficient knowledge regarding trends of occurrence and whether, in their expert opinion, the practice represented a threat to carnivores (Tables 2 and 3). Regionally, a greater percentage of respondents from Southern Africa (25%) perceived the practice as possibly representing a threat to lions within their study areas, compared to respondents from West and Central (17%) or East (7%) Africa (Table 3). More than one-quarter (28%) of those responding perceived human kleptoparasitism on lion kills as representing a threat across the species' range (Table 2).

Human kleptoparasitism on kills made by other large carnivore species also was investigated. More than half (20/37, 54%) of respondents reported insufficient knowledge on species other than lion. However, because the survey targeted experts and stakeholders with knowledge specifically on lions, and because not all other species of large carnivores occur throughout the entire lion range, the number of reports of meat taken from other species are not directly comparable. In summary, twelve respondents had knowledge of leopard losing kills to humans, seven reported occurrence of meat theft from spotted hyena, while fewer (4) and (3) respondents reported meat theft from cheetah and wild dog, respectively.

## Discussion

For millions of years, large carnivores have competed over access to carcasses, adapting their behaviors and social systems to maximize benefits while reducing costs of intra and interspecific kleptoparasitism [15, 66, 69–72]. Concurrently, early hominids are believed to have included meat in their diet both from scavenging and actively chasing carnivores off kills [41, 73–76]. This practice, which may have represented a survival strategy for ancient humans, still exists in present-day Africa as a means for people to obtain animal protein. Traditional hunters, such as the Hazda, still obtain meat by scavenging from lions [73, 77, 78]. Schaller (1972) [79] demonstrated how readily humans can displace lions to scavenge their kills [80]; other cases of modern human kleptoparasitism have been documented [19, 20].

If large carnivores have evolved to fight for possession of their kills, sometimes losing that battle to competitors, why should modern human kleptoparasitism be a cause for concern?

The dynamics between modern humans and large carnivores have changed. The majority of modern threats to large carnivores are anthropogenic e.g., habitat loss and alteration [64], reduction of prey populations [63], and retaliatory killing [65]. Growing human populations and associated development adjacent to shrinking protected areas is increasing human-wildlife conflicts [81, 82] including direct competition for wild prey [83, 84], although not all studies agree that human-carnivore conflict is increasing [85] (but see [86]). As “super-predators” [42], humans now increasingly impact large carnivores inducing fear [43, 44], causing stress [25, 29], and altering carnivore behavior, activity patterns, and movements [27, 43, 44, 45, 48, 50, 87, 88].

Consequences of human disturbance may be most severe when carnivores are feeding [26, 32], resulting in a reduction of the total amount of meat consumed [36, 46, 47]. The mere perception of human threat i.e., the sound of humans conversing, caused pumas, *Puma concolor*, to shorten their feeding periods [44]. Carnivores that lose substantial portions of their kills must increase their hunt frequency and kill additional prey to replace the resources lost [36, 43, 44, 47]. Stress, energy expenditure, and risk of physical injury associated with replacing lost resources may especially impact vulnerable individuals e.g., pregnant or nursing females [89], young cubs, and animals in poor condition, as well as the most vulnerable populations e.g., lions in West and Central Africa where prey densities are very low and, thus, the energetic



costs of replacing lost prey are especially high [90, 91]. Moreover, the resultant increase in predation can potentially exacerbate human-wildlife conflict if carnivores target livestock to replace their lost kills. Ultimately, sub-lethal physiological effects of human disturbance may reduce individual fitness or survival [92, 93], and human-induced behavioral changes may alter the functional role of large carnivores as apex predators [44, 94].

Our study found modern human kleptoparasitism to be geographically widespread in sub-Saharan Africa. Surveyed experts confirmed the modern practice in 12 countries in Africa that constitute the majority of extant lion populations [68]. This represents the minimum geographic extent; kleptoparasitism may occur in lion range states not surveyed in our study. Our results may also contain reporting bias if those aware of the practice were more likely to report it; this applies both to survey recipients and to local people. Further, the likelihood of local people detecting and reporting kleptoparasitism to our experts may have been greater in areas of higher human density. Conversely, reluctance of local people to disclose the activity may have resulted in underestimates of occurrence. Thus, it is unlikely that non-response at either the expert or local level directionally biased our results. Nearly one-half of the survey respondents cited insufficient knowledge as to whether human kleptoparasitism was increasing, stable, or decreasing, underscoring a dearth of information on the modern practice.

Human detection of kills was largely opportunistic. However, once a kill was found, humans actively chased carnivores off of the carcass 50% of the time. More than half of all reported cases involved humans taking kills of wild game. The taking or possession of game meat is a largely illegal activity in most African countries [95], and the risk of disciplinary action may prompt discretion among those involved. This includes enforcement personnel; in about one quarter of the cases, anti-poaching game scouts were reported to be secondary participants, often keeping confiscated meat for themselves. Similarly, Treves and Naughton-Treves (1999) noted that game wardens in Uganda likely under-reported successful instances of humans scavenging on carnivore kills. Fenced reserves, or reserves with strict rules against kleptoparasitism appeared to have reduced (reported) incidents, or absence of incidents. However, where enforcement is lacking, kleptoparasitism has been associated with other unlawful activities i.e., illegal diamond extraction in remote parks in the Central African Republic [20].

In contrast to game meat, people have legal ownership of livestock and viewed repossession of depredated livestock carcasses as ‘taking back’ the meat of an animal they already owned. Thus, prey type is an important factor in assessing kleptoparasitism of carnivore kills because not only do people have the legal right to repossess a livestock carcass, they also may be more motivated to do so from a herding (cultural) standpoint. As a result, both humans and carnivores may face increased risk of injury in confrontations over possession of livestock carcasses.

Culture, religion, and social status influenced whether communities or individuals condoned kleptoparasitism. Therefore, it is possible that, within the range states where kleptoparasitism was confirmed, the occurrence was localized or sporadic. For example, meat theft from carnivores is common practice within the nomadic Mbororo in Northern Cameroon [96]. In contrast, Muslims, a prevalent religion in Sudan and Tanzania, hold strict taboos regarding how animals must be slaughtered (i.e., halal) [97], making meat obtained through kleptoparasitism unfit for human consumption. Some viewed kleptoparasitism as socially beneath them, while others who stood to gain a share of the meat were more accepting of the practice. Unsurprisingly, economic status was reported as an important factor; community members with low income, including park staff with low remuneration, were reportedly more likely to partake in the activity often to supplement their protein supply. Because people who kleptoparasitize carnivores gain an immediate and tangible benefit i.e., meat to consume or sell for cash, it raises the question as to why this practice is not more ubiquitous. It is possible (and highly likely) that insufficient knowledge even among experts and stakeholders, attributable at least in part

to a reluctance among local people to report the practice, resulted in significant underestimates of the frequency with which modern human kleptoparasitism occurs.

### Costs to carnivores

The energetics of a carnivore lifestyle are complex [1, 98]. Comprehensive calculations of the costs for carnivores to locate, pursue, capture, kill, defend, lose, and subsequently replace their prey are beyond the scope of this paper. However, increasingly, new technologies i.e., accelerometer and GPS collars, allow for quantification of the energetics of carnivore locomotion and hunting behavior [4, 5, 7, 8, 99], as well as the behavioral and physiological responses of carnivores to human disturbance [43, 44]. Combined with other measures e.g., prey size, length of time feeding prior to interruption, amount of meat lost, these methods could provide an improved accounting of the costs that modern humans exact by disturbing carnivores for access to their kills.

For lions, costs and benefits of hunting vary across sex and age classes. Individuals perform different roles during a hunt, and once a kill is made, all lions do not feed equally [79]. Lion males may displace females and feed exclusively for a period of time [79]. If humans disrupt feeding and remove prey shortly after it has been killed, especially when entire carcasses are taken, the individuals who participated in the hunt endure the costs while obtaining few benefits. Loss of an entire carcass can occur quickly when people become aware of a fresh kill. An incident witnessed by one of the authors (PAW), involved 2 lionesses and 4 cubs (approx. 3mon old) that scattered in different directions away from the carcass of an adult female kongoni, *Alcelaphus buselaphus*, upon which they had just begun feeding when approached by 5 men brandishing machetes and long poles. The men used the poles to carry away the entire carcass of the kongoni which the lionesses had killed only 20min prior and on which they could, theoretically, have spent > 4hrs feeding if left undisturbed [100]. Loss of large carcasses may particularly impact young cubs because cubs obtain more food when feeding on large carcasses than when feeding on small carcasses [79].

Depending on prey size and number of animals feeding, lions may remain near a kill and return to feed over the course of several days [79]. Thus, scavenging meat when lions are absent does not mean that they had finished feeding. Likewise, prey consumption among solitary felids e.g., leopard, puma, lynx, *Lynx lynx*, is prolonged, with a kill often providing food for multiple days [36, 98, 101]. Human kleptoparasitism may involve a portion of meat only. As recorded in documentary footage [102], Maasai in Kenya targeted lion kills with the intention of taking only a leg. Similarly, a visitor to Waza National Park, Cameroon, was observed to opportunistically take a leg from a freshly lion-killed roan antelope, *Hippotragus equinus*, (de Iongh, pers. obs.). Although losing a partial carcass may be less costly, the amount remaining for successive feeding bouts is reduced [20] and other costs i.e., stress, risk of injury, energetic costs of prey replacement, are incurred.

Energy budgets are influenced by environmental variables including terrain [9], season [103], ambient temperature [104], and geographic region. Where prey density is low e.g., West and Central Africa [90, 91], loss of a kill constitutes a pronounced hardship as carnivores may have to travel greater distances to find another vulnerable prey, thereby increasing their energetic costs [1, 6, 92, 100]. Greater travel distance also increases both the risk of encountering territorial conspecifics and, for lionesses with small cubs, the amount of time that young are left unaccompanied [79].

Carnivores chased from their kill are subject to injury by the people who displace them. Confrontational scavenging may involve hand-held weapons e.g., machetes, clubs, hurled rocks and sticks, and shouting (White, pers. obs.). On multiple occasions in protected areas in

Zambia, groups of local men carrying machetes and clubs directly approached a concealed research vehicle that was broadcasting sounds of a dying buffalo meant to attract lions. Upon discovering the sound source, the men proffered the explanation that “if we had found lions, we would not have stolen their kill” even though no inquiries had been made as to their intentions (White, pers. obs.).

When humans remove entire carcasses, scavenging species also lose food resources [36]. Where resources are sparse, utilization of carcasses, including bone consumption, increases and can result in higher rates of tooth breakage and wear (gray wolf, *Canis lupus*, [105]). Spotted hyenas in the Luangwa Valley (LV) and Greater Kafue Ecosystem (GKE), Zambia, two regions where human kleptoparasitism was reported to occur frequently (this study), were found to have the highest rates of tooth breakage among any hyenas sampled [10]. High rates of human kleptoparasitism on lion kills that reduced scavengers’ access to carrion may have contributed to the high rates of tooth wear and fracture found in LV and GKE spotted hyenas. Carrion consumption is an important, largely understudied, component of energy transfer in food-webs [106–108]. Human removal of carrion from ecosystems can result in cascading ecological effects on scavenger communities [51–54].

While this paper focuses on direct impacts of human kleptoparasitism on carnivores, this practice also presents a significant concern in the context of ‘One Health’ [109], which is a unifying framework integrating health of people, animals, and the environment. The majority of zoonotic emerging infectious diseases originate in wildlife [110–112]. Human kleptoparasitism represents a human-wildlife interface which may increase the likelihood of zoonotic disease transmission [111] both through the handling (butchering) and consumption of wild game i.e., bushmeat [113, 114]. Bushmeat is known to harbor diseases potentially transmissible to humans [115], although the health risks have not been thoroughly investigated [114, 116–118].

That people risk confronting dangerous large carnivores on their kills highlights the lack of available protein in many marginalized communities [35, 116, 118]. Despite accounts of kleptoparasitism being easily accomplished [80], there are numerous reports of large carnivores (lion [19, 34], leopard [19], and tiger, *Panthera tigris*, [55]) attacking and killing people in defense of their prey.

Often, however, lions and other large carnivores do not attempt to defend their kills when challenged by humans, especially when people approach in groups [20, 79, 102]. The opportunity to obtain meat from a kill may increase human tolerance for living near large carnivores [119, 120]. For example, in Uganda, local people benefitted from the predictability of kills made by a particular lion and a leopard with two cubs whom they routinely drove off kills to obtain meat [19]. While any increase in tolerance towards carnivores might be viewed as a measure of conservation success, repeated disturbance and meat and carcass theft are clearly detrimental to carnivores. Human kleptoparasitism on lions in the Gir Forest, India, is believed to have directly contributed to the lion population decline [33, 121]. Likewise, the female leopard in Uganda repeatedly robbed of its kills ultimately attacked its human tormentors in efforts to maintain possession of its prey to feed itself and two cubs [19]. Thus, the short-term benefit of tolerance must be weighed against the cumulative, long-term costs to individual carnivores and local carnivore populations. Ensuring that people have access to alternative sources of protein, thereby eliminating their need to obtain meat from carnivore kills, is key to addressing this issue.

## Conclusion

Our survey found modern human kleptoparasitism on kills made by lions, and possibly other large carnivores in Africa, to be geographically more widespread than previously reported.

Humans disrupted carnivores at their kills of wild game and livestock to procure game meat and compensate for losses, respectively. Economic hardship was a main driver of the practice, with game meat important both for personal consumption and trade. Although modern human kleptoparasitism may appear inconsequential in comparison to other anthropogenic threats, the frequency at which carnivores lose kills to humans is likely underestimated. The fact that our surveyed experts repeatedly cited a lack of information, and the strong likelihood that cases go unreported, suggests that the impacts of modern human kleptoparasitism may be higher than are currently recognized. Whether chased or scavenged, the loss of meat or entire carcasses to humans, particularly wild game, represents additive costs to carnivores that should not be dismissed. We argue that human kleptoparasitism of carnivore kills poses an important yet largely cryptic anthropogenic threat that negatively impacts not only the individual carnivores that lose their meal, but also scavenger populations and the broader ecological community. Further, the potential health threats to humans from taking meat from carnivore kills have not been investigated. We propose that modern human kleptoparasitism warrants greater scrutiny.

## Supporting information

**S1 Checklist. Inclusivity in global research questionnaire.**  
(DOCX)

**S1 Appendix. Survey questionnaire.** Survey on humans taking meat from kills made by lions (kleptoparasitism).  
(DOCX)

**S1 Table. Current African lion range states and survey status for this study.**  
(DOCX)

## Acknowledgments

We thank the members of the African Lion Working Group, conservation organizations, professional hunters, and other stakeholders who participated in this study. Sincere thanks to A. Mateos and A. Treves for their constructive reviews that improved this manuscript. We dedicate this paper to the memory of our colleague, student, and friend, the late Kennedy Kariuki, a passionate conservationist and wildlife researcher, who compiled the original survey data into a preliminary report.

## Author Contributions

**Conceptualization:** Paula A. White, Laura D. Bertola, Kennedy Kariuki, Hans H. de Iongh.

**Data curation:** Paula A. White, Laura D. Bertola, Kennedy Kariuki, Hans H. de Iongh.

**Formal analysis:** Paula A. White, Laura D. Bertola, Kennedy Kariuki, Hans H. de Iongh.

**Investigation:** Paula A. White, Laura D. Bertola, Kennedy Kariuki, Hans H. de Iongh.

**Methodology:** Paula A. White, Laura D. Bertola, Kennedy Kariuki, Hans H. de Iongh.

**Writing – original draft:** Paula A. White, Laura D. Bertola, Kennedy Kariuki, Hans H. de Iongh.

**Writing – review & editing:** Paula A. White, Laura D. Bertola, Kennedy Kariuki, Hans H. de Iongh.

## References

1. Carbone C, Teacher A, Rowcliffe JM. The costs of carnivory. *PLOS Biology*. 2007; 5(2):0363–0368 e22. <https://doi.org/10.1371/journal.pbio.0050022> PMID: 17227145
2. Chassin PS, Taylor CR, Heglund NC, Seeherman HJ. Locomotion in lions: energetic cost and maximum aerobic capacity. *Physiological and Biochemical Zoology*. 1976; 49(1):1–10. <https://doi.org/10.1086/physzool.49.1.30155672>
3. Elliott JP, McTaggart-Cowan I, Holling CS. Prey capture by the African lion. *Canadian Journal of Zoology*. 1977; 55(11):1811–1828. <https://doi.org/10.1139/z77-235>
4. Williams TM, Wolfe L, Davis T, Kendall T, Richter B, Wang Y, et al. Instantaneous energetics of puma kills reveal advantage of felid sneak attacks. *Science*. 2014; 346(6205):81–85. <https://doi.org/10.1126/science.1254885> PMID: 25278610
5. Wilmers CC, Nickel B, Bryce CM, Smith JA, Wheat RE, Yovovich V. The golden age of bio-logging: how animal-borne sensors are advancing the frontiers of ecology. *Ecology*. 2015; 96(7):1741–1753. <https://doi.org/10.1890/14-1401.1> PMID: 26378296
6. Hubel TY, Myatt JP, Jordan NR, Dewhirst OP, McNutt JW, Wilson AM. Energy cost and return for hunting in African wild dogs and cheetahs. *Nature Communications*. 2016; 7:11034. <https://doi.org/10.1038/ncomms11034> PMID: 27023457
7. Bryce CM, Wilmers CC, Williams TM. Energetics and evasion dynamics of large predators and prey: pumas vs. hounds. *PeerJ*. 2017; 5: e3701. <https://doi.org/10.7717/peerj.3701> PMID: 28828280
8. Ivanova MI. Energy consumption and expenditure of *Panthera pardus* in the Southern African region: how much hunting success is enough? *International Journal of Biodiversity and Conservation*. 2017; 9(12):342–349. <https://doi.org/10.5897/IJBC2017.1145>
9. Hayward MW, Kerley GIH. Prey preferences of the lion (*Panthera leo*). *Journal of Zoology*. 2005; 267:309–322. <https://doi.org/10.1017/S0952836905007508>
10. Van Valkenburgh B, White PA. Naturally-occurring tooth wear, tooth fracture, and cranial injuries in large carnivores from Zambia. *PeerJ*. 2021; 9: e11313. <https://doi.org/10.7717/peerj.11313> PMID: 33976987
11. Mech LD, Nelson ME. Evidence of prey-caused mortality in three wolves. *American Midland Naturalist*. 1989; 123(1): 207–208. <https://doi.org/10.2307/2425775>
12. Weaver JL, Arvidson C, Wood P. Two wolves, *Canis lupus*, killed by a moose, *Alces alces*, in Jasper National Park, Alberta. *Canadian Field-Naturalist*. 1992; 106(1):126–127. <https://doi.org/10.5962/p.356893>
13. Rothschild M, Clay T. Fleas, flukes and cuckoos. A study of bird parasites. London (UK): Collins; 1957.
14. Gorman ML, Mills MG, Raath JP, Speakman JR. High hunting costs make African wild dogs vulnerable to kleptoparasitism by hyaenas. *Nature*. 1998; 391:479–481. <https://doi.org/10.1038/35131> PMID: 28709280
15. Höner OP, Wachter B, East ML, Hofer H. The response of spotted hyaenas to long-term changes in prey populations: functional response and interspecific kleptoparasitism. *Journal of Animal Ecology*. 2002; 71(2):236–246. <https://doi.org/10.1046/j.1365-2656.2002.00596.x>
16. Höner OP, Wachter B, East ML, Runyoro VA, Hofer H. The effect of prey abundance and foraging tactics on the population dynamics of a social, territorial carnivore, the spotted hyena. *Oikos*. 2005; 108(3):544–554. <https://doi.org/10.1111/j.0030-1299.2005.13533.x>
17. Hunter JS, Durant SM, Caro TM. To flee or not to flee: predator avoidance by cheetahs at kills. *Behavioral Ecology and Sociobiology* 2007; 61(7):1033–1042. <https://doi.org/10.1007/s00265-006-0336-4>
18. Périquet S, Fritz H, Revilla E. The Lion King and the Hyaena Queen: large carnivore interactions and coexistence. *Biological Reviews*. 2015; 90(4):1197–1214. <https://doi.org/10.1111/brv.12152> PMID: 25530248
19. Treves A, Naughton-Treves L. Risk and opportunity for humans coexisting with large carnivores. *Journal of Human Evolution*. 1999; 36(3):275–282. <https://doi.org/10.1006/jhev.1998.0268> PMID: 10074384
20. Schoe M, de Iongh HH, Croes BM. Humans displacing lions and stealing their food in Benoue National Park, North Cameroon. *African Journal of Ecology*. 2009; 47(3):445–447. <https://doi.org/10.1111/j.1365-2028.2008.00975.x>
21. Loveridge AJ, Searle AW, Murindagomo F, Macdonald DW. The impact of sport-hunting on the population dynamics of an African lion population in a protected area. *Biological Conservation*. 2007; 134(4):548–558. <https://doi.org/10.1016/j.biocon.2006.09.010>

22. Packer C, Brink H, Kissui BM, Maliti H, Kushnir H, Caro T. Effects of trophy hunting on lion and leopard populations in Tanzania. *Conservation Biology*. 2011; 25(1):142–153. <https://doi.org/10.1111/j.1523-1739.2010.01576.x> PMID: 20825444
23. Lindsey PA, Balme GA, Booth VR, Midlane N. The significance of African lions for the financial viability of trophy hunting and the maintenance of wild land. *PLOS ONE*. 2012; 7(1):e29332. <https://doi.org/10.1371/journal.pone.0029332> PMID: 22247772
24. Elbroch LM, Treves A. Perspective: Why might removing carnivores maintain or increase risks for domestic animals? *Biological Conservation*. 2023; 283:110106. <https://doi.org/10.1016/j.biocon.2023.110106>
25. Hayward MW, Hayward GJ. The impacts of tourists on lion *Panthera leo* behavior, stress and energetics. *Acta Theriologica*. 2009; 54(3):219–224. <https://doi.org/10.4098/j.at.0001-7051.074.2008>
26. Ordiz A, Støen O-G, Sæbø S, Kindberg J, Delibes M, Swenson JE. Do bears know they are being hunted? *Biological Conservation*. 2012; 152:21–28. <https://doi.org/10.1016/j.biocon.2012.04.006>
27. Ordiz A, Støen O-G, Sæbø S, Sahlén V, Pedersen BE, Kindberg J, et al. Lasting behavioural responses of brown bears to experimental encounters with humans. *Journal of Applied Ecology*. 2013a; 50(2):306–314. <https://doi.org/10.1111/1365-2664.12047>
28. White PA, Van Valkenburgh B. Low-cost forensics reveal high rates of non-lethal snaring and shotgun injuries in Zambia's large carnivores. *Frontiers in Conservation Science*. 2022;3. <https://doi.org/10.3389/fcosc.2022.803381>
29. Creel S, Fox JE, Hardy A, Sands J, Garrott RA, Peterson RO. Snowmobile activity and glucocorticoid stress responses in wolves and elk. *Conservation Biology*. 2002; 16:809–814. <https://doi.org/10.1046/j.1523-1739.2002.00554.x>
30. Broekhuis F. Natural and anthropogenic drivers of cub recruitment in a large carnivore. *Ecology and Evolution*. 2018; 8(13):6748–6755. <https://doi.org/10.1002/ece3.4180> PMID: 30038771
31. Eaton RL. Hunting behavior of the cheetah. *Journal of Wildlife Management*. 1970; 34(1):56–67. <https://doi.org/10.2307/3799492>
32. Rode KD, Farley SD, Robbins CT. Behavioral responses of brown bears mediate nutritional effects of experimentally introduced tourism. *Biological Conservation*. 2006; 133:70–80. <https://doi.org/10.1016/j.biocon.2006.05.021>
33. Sunquist ME, Sunquist FC. Ecological constraints on predation by large felids. In: Gittleman JL, editor. *Carnivore behaviour, ecology, and evolution*. New York (NY): Cornell University Press; 1989.
34. Marks SA. *Large mammals and a brave people: subsistence hunters in Zambia*. New Brunswick (NJ): Transaction Publishers; 2005.
35. Davies G, Brown D. *Bushmeat and livelihoods*. Oxford (UK): Blackwell Publishing Ltd.; 2007.
36. Krofel M, Kos I, Linnell J, Odden J, Teurlings I. Human kleptoparasitism on Eurasian lynx (*Lynx lynx* L.) in Slovenia and Norway. *Varstvo Narave*. 2008; 21:93–103.
37. Domínguez-Rodrigo M, Baquedano E, Organista E, Cobo-Sánchez L, Mabulla A, Maskara V, et al. Early Pleistocene faunivorous hominins were not kleptoparasitic, and this impacted the evolution of human anatomy and socio-ecology. *Scientific Reports*. 2021; 11:16135. <https://doi.org/10.1038/s41598-021-94783-4> PMID: 34373471
38. Blumenschine RJ. Early hominid scavenging opportunities: implications of carcass availability in the Serengeti and Ngorongoro ecosystems. *British Archaeological Reports*. 1986;283.
39. Stanford CB, Bunn HT. *Meat-eating and human evolution*. Oxford (UK): Oxford University Press; 2001.
40. Parkinson JA. Revisiting the hunting-versus-scavenging debate at FLK Zinj: A GIS spatial analysis of bone surface modifications produced by hominins and carnivores in the FLK 22 assemblage, Olduvai Gorge, Tanzania. *Palaeogeography, Palaeoclimatology, Palaeoecology*. 2018; 511:29–51. <https://doi.org/10.1016/j.palaeo.2018.06.044>
41. Pobiner BL. The zooarchaeology and paleoecology of early hominin scavenging. *Evolutionary Anthropology: Issues, News, and Reviews*. 2020; 29(2):68–82. <https://doi.org/10.1002/evan.21824> PMID: 32108400
42. Darimont CT, Fox CH, Bryan HM, Reimchen TE. The unique ecology of human predators. *Science*. 2015; 349:858–860. <https://doi.org/10.1126/science.aac4249> PMID: 26293961
43. Smith JA, Wang Y, Wilmers CC. Top carnivores increase their kill rates on prey as a response to human-induced fear. *Proceedings of the Royal Society B*. 2015; 282(1802):20142711. <https://doi.org/10.1098/rspb.2014.2711> PMID: 25608884



44. Smith JA, Suraci JP, Clinchy M, Crawford A, Roberts D, Zanette LY, et al. Fear of the human 'super predator' reduces feeding time in large carnivores. *Proceedings of the Royal Society B*. 2017; 284(1857):20170433. <https://doi.org/10.1098/rspb.2017.0433> PMID: 28637855
45. Suraci JP, Clinchy M, Zanette LY, Wilmers CC. Fear of humans as apex predators has landscape-scale impacts from mountain lions to mice. *Ecology Letters*. 2019;22(10). <https://doi.org/10.1111/ele.13344> PMID: 31313436
46. Kerley LL, Goodrich JM, Miquelle DG, Smirnov EN, Quigley HB, Hornocker MG. Effects of Roads and Human Disturbance on Amur Tigers. *Conservation Biology*. 2002; 16(1):97–108. <https://doi.org/10.1046/j.1523-1739.2002.99290.x> PMID: 35701953
47. Teurlings IJM, Odden J, Linnell JDC, Melis C. Caching behavior of large prey by Eurasian lynx: quantifying the anti-scavenging benefits. *Diversity*. 2020; 12:350. <https://doi.org/10.3390/d12090350>
48. Oriol-Cotterill A, Macdonald DW, Valeix M, Ekwanga S, Frank LG. Spatiotemporal patterns of lion space use in a human-dominated landscape. *Animal Behaviour*. 2015; 101:27–39. <https://doi.org/10.1016/j.anbehav.2014.11.020>.
49. Hemson G. The ecology and conservation of lions: human-wildlife conflict in semi-arid Botswana [PhD dissertation]. Oxford (UK); University of Oxford; 2003.
50. Gatta M. Systematic review of mammalian activity patterns and common factors thought to influence activity patterns [MS thesis]. Leiden (The Netherlands): Leiden University; 2017.
51. DeVault TL, Rhodes OE, Shivik JA. Scavenging by vertebrates: behavioral, ecological, and evolutionary perspectives on an important energy transfer pathway in terrestrial ecosystems. *Oikos*. 2003; 102(2):225–234. <https://doi.org/10.1034/j.1600-0706.2003.12378.x>
52. Moleón M, Sánchez-Zapata JA, Margalida A, Carrete M, Owen-Smith N, Donazar JA. Humans and scavengers: the evolution of interactions and ecosystem services. *BioScience*. 2014; 64:394–403. <https://doi.org/10.1093/biosci/biu034>
53. Moleón M, Sánchez-Zapata JA. The living dead: time to integrate scavenging into ecological teaching. *BioScience*. 2015; 65(10):1003–1010. <https://doi.org/10.1093/biosci/biv101>
54. O'Bryan CJ, Braczkowski AR, Beyer HL, Carter NH, Watson JEM, McDonald-Madden E. The contribution of predators and scavengers to human wellbeing. *Nature Ecology and Evolution*. 2018; 2(2):229–36. <https://doi.org/10.1038/s41559-017-0421-2> PMID: 29348647
55. Gurung B, David Smith JL, McDougal C, Karki JB, Barlow A. Factors associated with human-killing tigers in Chitwan National Park, Nepal. *Biological Conservation*. 2008; 141(12):3069–3078. <https://doi.org/10.1016/j.biocon.2008.09.013>
56. Frank LG, Cotterill A, Dolrenry S, Hazzah L. The role of carbofuran in the decline of lions and other carnivores in Kenya. In: Richards N, editor. *Carbofuran and wildlife poisoning: Global perspectives and forensic approaches*. Chichester (England): John Wiley & Sons Ltd.; 2012. p. 70–74.
57. Ogada DL. The power of poison: pesticide poisoning of Africa's wildlife. *Annals of the New York Academy of Sciences*. 2014; 1322:1–20. <https://doi.org/10.1111/nyas.12405> PMID: 24716788
58. Ogada D, Shaw P, Beyers RL, Buij R, Murn C, Thiollay JM, et al. Another continental vulture crisis: Africa's vultures collapsing toward extinction. *Conservation Letters*. 2016; 9:89–97. <https://doi.org/10.1111/conl.12182>
59. Kissui BM. Livestock predation by lions, leopards, spotted hyenas, and their vulnerability to retaliatory killing in the Maasai steppe, Tanzania. *Animal Conservation*. 2008; 11(5):422–432. <https://doi.org/10.1111/j.1469-1795.2008.00199.x>
60. Hazzah L, Dolrenry S, Naughton L, Edwards CTT, Mwebi O, Kearney F, et al. Efficacy of two lion conservation programs in Maasailand, Kenya. *Conservation Biology*. 2014; 28(3):851–860. <https://doi.org/10.1111/cobi.12244> PMID: 24527992
61. Bauer H. Lion conservation in West and Central Africa: integrating social and natural science for wildlife conflict resolution around Waza National Park, Cameroon [PhD dissertation]. Leiden (The Netherlands): Leiden University; 2003.
62. Stein AB, Athreya V, Gerngross P, Balme G, Henschel P, Karanht U, et al. *Panthera pardus*. The IUCN Red List of Threatened Species. 2023:e.T15954A215195554. Accessed 2023 February 8. <https://dx.doi.org/10.2305/IUCN.UK.2023-1.RLTS.T15954A215195554.en>.
63. Becker M, McRobb R, Watson F, Droge E, Kanyembo B, Murdoch J, et al. Evaluating wire-snare poaching trends and the impacts of by-catch on elephants and large carnivores. *Conservation Biology*. 2013; 158: 26–36. <https://doi.org/10.1016/j.biocon.2012.08.017>
64. Bauer H, Dickman A, Chapron G, Oriol-Cotterill A, Nicholson SK, Sillero-Zubiri C, et al. Threat analysis for more effective lion conservation. *Oryx*. 2020; 56(1):108–115. <https://doi.org/10.1017/S0030605320000253>

65. Sibanda L, Johnson PJ, van der Meer E, Hughes C, Dlodlo B, Mathe LJ, et al. Effectiveness of community-based livestock protection strategies: a case study of human-lion conflict mitigation. *Oryx*. 2021; 56(4):537–545. <https://doi.org/10.1017/S0030605321000302>
66. Hayward MW, Kerley GIH. Prey preferences and dietary overlap amongst Africa's large predators. *South African Journal of Wildlife Research*. 2008; 38(2):93–108. <https://doi.org/10.3957/0379-4369-38.2.93>
67. Lamprecht J. On diet, foraging behaviour and interspecific food competition of jackals in the Serengeti National Park, East Africa. *Zeitschrift für Säugetierkunde*. 1978; 43: 210–223. BHL: PMID: 45539835.
68. Nicholson S, Bauer H, Strampelli P, Sogbohossou E, Ikanda D, Tumenta PF, et al. *Panthera leo*. The IUCN Red List of Threatened Species. 2023:e.T15951A231696234. <https://dx.doi.org/10.2305/IUCN.UK.2023-1.RLTS.T15951A231696234.en>. Accessed 2024 February 7.
69. Creel S. Four factors modifying the effect of competition on carnivore population dynamics as illustrated by African wild dogs. *Conservation Biology*. 2001; 15:271–274. <https://doi.org/10.1111/j.1523-1739.2001.99534.x>
70. Trinkel M, Kastberger G. Competitive interaction between spotted hyenas and lions in the Etosha National Park, Namibia. *African Journal of Ecology*. 2005; 43(3):220–224. <https://doi.org/10.1111/j.1365-2028.2005.00574.x>
71. Broekhuis F, Grünewälder S, McNutt JW, Macdonald DW. Optimal hunting conditions drive circalunar behavior of a diurnal carnivores. *Behavioral Ecology*. 2014; 25(5):1268–1275. <https://doi.org/10.1093/beheco/aru122>
72. Tarugara A, Clegg BW, Gandiwa E, Muposhi VK. The effect of competing carnivores on the feeding behavior of leopards (*Panthera pardus*) in an African savanna. *Ecology and Evolution*. 2020; 11:7743–7753. <https://doi.org/10.1002/ece3.7608> PMID: 34188848
73. Bunn HT, Ezzo JA. Hunting and scavenging by Plio-Pleistocene hominids: nutritional constraints, archaeological patterns, and behavioural implications. *Journal of Archaeological Science*. 1993; 20:365–398. <https://doi.org/10.1006/JASC.1993.1023>
74. Oliver JS. Estimates of hominid and carnivore involvement in the FLK Zinjanthropus fossil assemblage: some socioecological implications. *Journal of Human Ecology*. 1994; 27:267–294. <https://doi.org/10.1006/jhev.1994.1046>
75. Mussi M, Palombo MR. Human/carnivore interaction in the middle Pleistocene of Latium (Central Italy): an open question. *Proceedings of The World of Elephants—1st International Congress*; 2001 Oct 16–20; Rome, Italy. 2001. p. 67–75. Available from: 86f073b60347e9d5bc9e9ea89fa2a358.pdf.
76. Treves A, Palmqvist P. Reconstructing hominin interactions with mammalian carnivores (6.0–1.8 ma). In: Nekaris KAI, Gursky SL, editors. *Primates and their predators*. New York (NY): Springer; 2007. p. 355–81. Available at [https://faculty.nelson.wisc.edu/treves/pubs/Treves\\_Palmqvist\\_2007.pdf](https://faculty.nelson.wisc.edu/treves/pubs/Treves_Palmqvist_2007.pdf).
77. Woodburn J. *Hunters and gatherers: the material culture of the nomadic Hadza*. London (UK): British Museum; 1970.
78. O'Connell JF, Hawkes K, Blurton-Jones N. Hadza scavenging: implications for Plio- Pleistocene hominid subsistence. *Current Anthropology*. 1988; 29(2):356–363. <https://doi.org/10.1086/203648>
79. Schaller GB. *The Serengeti lion*. *Wildlife Behavior and Ecology Series*. Chicago (IL): University of Chicago Press; 1972.
80. Schaller GB, Lowther GR. The relevance of carnivore behavior to the study of early hominids. *Southwestern Journal of Anthropology*. 1969; 25:307–41. <https://doi.org/10.1086/soutjanth.25.4.3629426>
81. Woodroffe R, Ginsberg JR (1998) Edge effects and the extinction of populations inside protected areas. *Science*. 1998; 280(5372):2126–2128. <https://doi.org/10.1126/science.280.5372.2126> PMID: 9641920
82. Woodroffe R, Thirgood S, Rabinowitz A, editors. *People and wildlife, conflict or co-existence?* Cambridge (UK): Cambridge University Press; 2005.
83. Treves A, Karanth KU. Human-carnivore conflict and perspectives on carnivore management worldwide. *Conservation Biology*. 2003; 17(6):1491–1499. <https://doi.org/10.1111/j.1523-1739.2003.00059.x>
84. Inskip C, Zimmermann A. Human-felid conflict: a review of patterns and priorities worldwide. *Oryx*. 2009; 43(1):18–34. <https://doi.org/10.1017/S003060530899030X>
85. Treves A, Santiago-Ávila FJ. Myths and assumptions about human-wildlife conflict and coexistence. *Conservation Biology*. 2020; 34(4):811–818. <https://doi.org/10.1111/cobi.13472> PMID: 32406969
86. Clark DA, Brook RK, Doney ED, Frank B, Jung TS, Lee DS, et al. Collaborative and consensus-based approaches for human-wildlife coexistence: response to Treves and Santiago-Ávila 2020. *Conservation Biology*. 2021; 35:1334–1336. <https://doi.org/10.1111/cobi.13787> PMID: 34324233

87. Gaynor KM, Hohnowski CE, Carter NH, Brashares JS. The influence of human disturbance on wildlife nocturnality. *Science*. 2018; 360:1232–1235. <https://doi.org/10.1126/science.aar7121> PMID: 29903973
88. Nickel BA, Suraci JP, Nisi AC, Wilmers CC. Energetics and fear of humans constrain the spatial ecology of pumas. *Proceeding of the National Academy of Sciences*. 2021; 118(5): e2004592118. <https://doi.org/10.1073/pnas.2004592118> PMID: 33495339
89. Maruping-Mzileni NT, Ferreira S, Young K, Funston PJ. Ecological drivers of female lion (*Panthera leo*) reproduction in the Kruger National Park. *Ecology and Evolution*. 2020; 10: 7995–8006. <https://doi.org/10.1002/ece3.5935> PMID: 32788956
90. de longh HH, Bauer H, Hamling P. A review of nine years research on a lion population in Waza National Park, North Cameroon. *Game and Wildlife Science Review*. 2004; 21(3):433–446.
91. de longh HH, Bauer H. Ten years of ecological research on lions in Waza National Park, Northern Cameroon. *Cat News*. 2008; 48:28–31.
92. Scantlebury DM, Mills MGL, Wilson RP, Wilson JW, Mills MEJ, Durant SM, et al. Flexible energetics of cheetah hunting strategies provide resistance against kleptoparasitism. *Science*. 2014; 346(6205):79–81. <https://doi.org/10.1126/science.1256424> PMID: 25278609
93. Wang Y, Smith JA, Wilmers CC. Residential development alters behavior, movement, and energetics in an apex predator, the puma. *PLOS ONE*. 2017; 12(10):e0184687. <https://doi.org/10.1371/journal.pone.0184687> PMID: 29020087
94. Ordiz A, Bischof R, Swenson JE. Saving large carnivores, but losing apex predators? *Biological Conservation*. 2013b; 168:128–133. <https://doi.org/10.1016/j.biocon.2013.09.024>
95. Lindsey PA, Balme G, Becker M, Begg C, Bento C, Bocchino C, et al. The bushmeat trade in African savannas: impacts, drivers, and possible solutions. *Biological Conservation*. 2013; 160:80–96. <https://doi.org/10.1016/j.biocon.2012.12.020>
96. Tumenta PF. Lion collaring report Waza National Park. Leiden (The Netherlands): Institute of Environmental Sciences, Leiden University; 2007.
97. Meyer-Rochow VB. Food taboos: their origins and purposes. *Journal of Ethnobiology and Ethnomedicine*. 2009; 5:18. <https://doi.org/10.1186/1746-4269-5-18> PMID: 19563636
98. Elbroch LM, Allen ML, Lowrey BH, Wittmer HU. The difference between killing and eating: ecological shortcomings of puma energetic models. *Ecosphere*. 2014; 5(5):1–16. <https://doi.org/10.1890/ES13-00373.1>
99. Wilson AM, Lowe JC, Roskilly K, Hudson PE, Golabek KA, McNutt JW. Locomotion dynamics of hunting in wild cheetahs. *Nature*. 2013; 498:185–189. <https://doi.org/10.1038/nature12295> PMID: 23765495
100. Scheel D., Profitability encounter rates, and prey choice of African lions. *Behavioral Ecology*. 1993; 4(1):90–97. <https://doi.org/10.1093/beheco/4.1.90>
101. Cavallo JA, Blumenshine RJ. Tree-stored leopard kills: expanding the hominid scavenging niche. *Journal of Human Evolution*. 1989; 18:393–399. [https://doi.org/10.1016/0047-2484\(89\)90038-9](https://doi.org/10.1016/0047-2484(89)90038-9)
102. BBC [Internet]. Men stealing meat from lions. British Broadcasting Corporation; 2015. Available from: <https://dai.ly/x2nhkrl>.
103. Davidson Z, Valeix M, Van Kersteren F, Loveridge AJ, Hunt JE, Murindagomo F, et al. Seasonal diet and prey preference of the African lion in a waterhole-driven semi-arid savanna. *PLOS ONE*. 2013; 8(2):e55182. <https://doi.org/10.1371/journal.pone.0055182> PMID: 23405121
104. Trethowan P, Fuller A, Haw A, Hart T, Markham A, Loveridge A, et al. Getting to the core: internal body temperatures help reveal the ecological function and thermal implications of the lions' mane. *Ecology and Evolution*. 2017; 7:253–262. <https://doi.org/10.1002/ece3.2556> PMID: 28070288
105. Van Valkenburgh B, Peterson RO, Smith DW, Stahler DR, Vucetich JA. Tooth fracture frequency in gray wolves reflects prey availability. 2019; *eLife* 8: e48628. <https://doi.org/10.7554/eLife.48628> PMID: 31549963
106. Wilson EE, Wolkovich EM. Scavenging: How carnivores and carrion structure communities. *Trends in Ecology and Evolution*. 2011; 26(3):129–135. <https://doi.org/10.1016/j.tree.2010.12.011> PMID: 21295371
107. Morant J, Arrondo E, Cortés-Avizanda A, Moleón M, Donázar JA, Sánchez-Zapata JA, et al. Large-scale quantification and correlates of ungulate carrion production in the Anthropocene. *Ecosystems*. 2023; 26:383–396. <https://doi.org/10.1007/s10021-022-00763-8>
108. Sebastián-González E, Morant J, Moleón M, Redondo-Gómez D, Morales-Reyes Z, Pascual-Rico R, et al. The underestimated role of carrion in vertebrates' diet studies. *Global Ecology and Biogeography*. 2023; 32(8):1302–1310. <https://doi.org/10.1111/geb.13707>

109. Mackenzie JS, Jeggo M. The One Health approach—why is it so important? *Tropical Medicine and Infection Disease*. 2019; 4:88. <https://doi.org/10.3390/tropicalmed4020088> PMID: 31159338
110. Daszak P, Cunningham AA, Hyatt AD. Emerging infectious diseases of wildlife—threats to biodiversity and human health. *Science*. 2000; 287:443–449. <https://doi.org/10.1126/science.287.5452.443> PMID: 10642539
111. Taylor LH, Latham SM, Woolhouse ME. Risk factors for human disease emergence. *Philosophical Transactions of the Royal Society London B*. 2001; 356(1411):983–989. <https://doi.org/10.1098/rstb.2001.0888> PMID: 11516376
112. Jones KE, Patel NG, Levy MA, Storeygard A, Balk D, Gittleman JL, et al. Global trends in emerging infectious diseases. *Nature*. 2008; 451(7181):990–993. <https://doi.org/10.1038/nature06536> PMID: 18288193
113. Wolfe ND, Daszak P, Kilpatrick AM, Burke DS. Bushmeat hunting, deforestation, and prediction of zoonotic disease. *Emerging Infectious Diseases*. 2005; 11(12):1822–1827. <https://doi.org/10.3201/eid1112.040789> PMID: 16485465
114. Van Vliet N, Moreno J, Gómez J, Zhou W, Fa JE, Golden C, et al. Bushmeat and human health: assessing the evidence in tropical and sub-tropical forests. *Ethnobiology and Conservation*. 2017; 6(3). <https://doi.org/10.15451/ec2017-04-6.3-1-45>
115. Kurpiers LA, Schulte-Herbrüggen B, Ejotre I, Reeder DM. Bushmeat and emerging infectious diseases: lessons from Africa. In: Angelici FM, editor. *Problematic wildlife*. Cham (Switzerland): Springer International Publishing; 2016. p. 507–551.
116. Cawthorn DM, Hoffman LC. The bushmeat and food security nexus: a global account of the contributions, conundrums and ethical collisions. *Food Research International*. 2015; 76:906–925. <https://doi.org/10.1016/j.foodres.2015.03.025>
117. Martins V, Shackleton CM. Bushmeat use is widespread but under-researched in rural communities of South Africa. *Global Ecology and Conservation*. 2019; 17:e00583. <https://doi.org/10.1016/j.gecco.2019.e00583>
118. Ingram DJ, Coad L, Milner-Gulland EJ, Parry L, Wilkie D, Bakarr MI, et al. Wild meat is still on the menu: progress in wild meat research, policy, and practice from 2002 to 2020. *Annual Review of Environment and Resources*. 2021; 46:221–54. <https://doi.org/10.1146/annurev-environ-041020-063132>
119. Gurven M. To give and to give not: the behavioral ecology of human food transfers. *Behavioral and Brain Sciences*. 2004; 27(4):543–560. <https://doi.org/10.1017/S0140525X04000123>
120. Lozano J, Olszańska A, Morales-Reyes Z, Castro AA, Malo AF, Moleón M, et al. Human-carnivore relations: a systematic review. *Biological Conservation*. 2019; 237:480–492. <https://doi.org/10.1016/j.biocon.2019.07.002>
121. Joslin P. Factors associated with decline of the Asiatic lion. In: Eaton RL, editor. *The world's cats Vol. 1*. Winston: World Wildlife Safari; 1973. p. 127–141.
